# Supplementary material for: β-Ni(OH)2 nanosheets: an effective sensing platform for constructing nucleic acid-based optical sensors
Source: Royal Society of Chemistry journal article supplement (doi:10.1039/c7tb01389b), 2017-01-01
Supplement: c7tb01389b1.pdf [file c7tb01389b1.pdf]

## Supporting Information

# $\beta$ -Ni(OH)<sub>2</sub> nanosheet: an effective sensing platform for constructing nucleic acid-based optical sensor

Hui Zhou,<sup>a,b</sup> Jun Bing Peng,<sup>b</sup> Xinlan Qiu,<sup>a</sup> Yan Sha Gao,<sup>a</sup> Limin Lu,<sup>\*a</sup> Wenmin Wang<sup>a</sup>

a. College of Science, Jiangxi Agricultural University, Nanchang 330045, PR China.

b. College of Chemistry and Chemical Engineering, Gannan Normal University, Ganzhou 341000, China.

## 1. Experimental Section

**Table S1.** Sequences of miRNAs and DNA probes used in this work

| Name       | Sequence (5'-3')                                       |
|------------|--------------------------------------------------------|
| 5-F        | FAM- CCA TC                                            |
| 9-F        | FAM- CCA TCT TTA                                       |
| 13-F       | FAM- CCA TCT TTA CCA G                                 |
| 17-F       | FAM- CCA TCT TTA CCA GAC AG                            |
| 22-F       | FAM- CCA TCT TTA CCA GAC AGT GTT A                     |
| 22-C       | Cy3 - CCA TCT TTA CCA GAC AGT GTT A                    |
| P-141      | FAM - CCA TCT TTA CCA GAC AGT GTT A -FAM               |
| MB         | FAM- <u>CCTCCACCCATCTTTACCAGACAGTGTTAGTGGAGG</u> -BHQ1 |
| miRNA-141  | U AAC ACU GUC UGG UAA AGA UGG                          |
| miRNA-429  | U AAU ACU GUC UGG UAA AAC CGU                          |
| miRNA-200b | U AAU ACU GCC UGG UAA UGA UGA                          |
| SmiRNA-141 | U AAC ACU GUC UAG UAA AGA UGG                          |
| miRNA-21   | U AGC UUA UCA GAC UGA UGU UGA                          |
| P-21       | TAMRA - TCA ACA TCA GTC TGA TAA GCT A - TAMRA          |
| DNA-141    | T AAC ACT GTC TGG TAA AGA TGG                          |

SmiRNA-141 is a single-base mismatched RNA, and the mismatched position is marked in red. The underlined sequence of MB is designed to recognize miRNA-141 and form MB/miRNA duplex. DNA-141 is a ssDNA with same sequences as miRNA-141.

## 2. Supplementary results

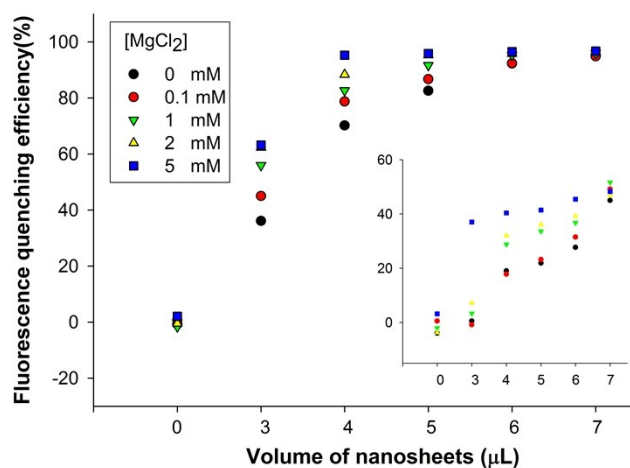

**Fig. S1** Quenching efficiency as a function of  $\beta$ -Ni(OH)<sub>2</sub> nanosheets with ssDNA (inset is dsDNA) in the presence of varying concentrations of MgCl<sub>2</sub>. The concentrations for  $\beta$ -Ni(OH)<sub>2</sub> nanosheets and DNA (ssDNA: 22-F; dsDNA: 22-F/DNA-141) were 480  $\mu$ g/mL and 50 nM, respectively. The buffer used in this experiment is 25 mM Tris-HCl (pH=8.0) containing 100 mM KCl.

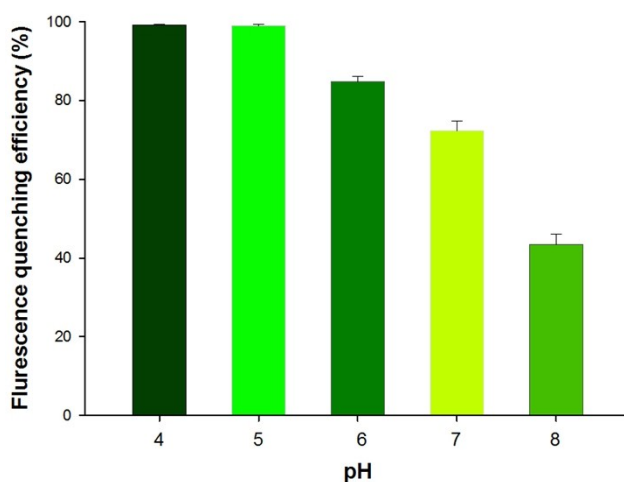

**Fig. S2** Effect of pH on the quenching efficiency between  $\beta$ -Ni(OH)<sub>2</sub> nanosheets and ssDNA. Each sample was prepared in 25 mM buffer containing 100 mM KCl, 1 mM MgCl<sub>2</sub>, 84  $\mu$ g/mL  $\beta$ -Ni(OH)<sub>2</sub> nanosheets and 600 nM 22-F ssDNA.

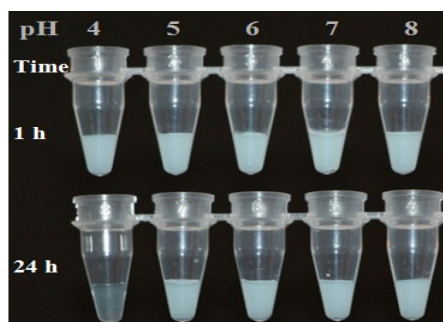

**Fig. S3** Effect of pH on the degradation of  $\beta$ -Ni(OH)<sub>2</sub> nanosheets. Each sample contains 2.4 mg/mL  $\beta$ -Ni(OH)<sub>2</sub> nanosheets.

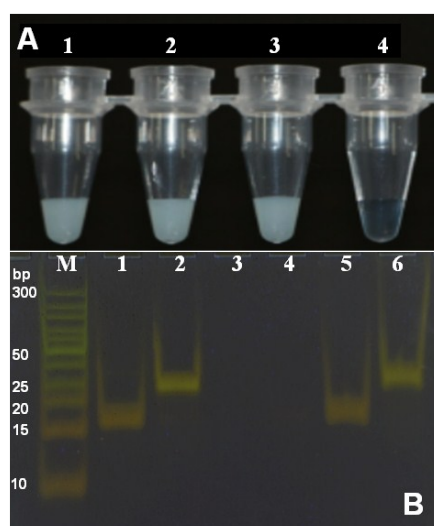

**Fig. S4 (A)** Photos of  $\beta$ -Ni(OH)<sub>2</sub> nanosheets (1) treated by adding 20 mM EDTA (2), heating at 95 °C (3) or both EDTA and heat (4). **(B)** Non-denatured PAGE analysis of the supernatant of different samples. Lane 1: 22-C; Lane 2: 22-C + DNA-141; Lane 3: 22-C +  $\beta$ -Ni(OH)<sub>2</sub> nanosheets + EDTA; Lane 4: 22-C +  $\beta$ -Ni(OH)<sub>2</sub> nanosheets + 95 °C heat treatment; Lane 5: 22-C +  $\beta$ -Ni(OH)<sub>2</sub> nanosheets + EDTA + 95 °C heat treatment; Lane 6: 22-C +  $\beta$ -Ni(OH)<sub>2</sub> nanosheets + EDTA + 95 °C heat treatment + DNA-141. Each sample contained a final buffer concentration of 25 mM, 100 mM KCl, 1 mM MgCl<sub>2</sub>, 0.96 mg/mL  $\beta$ -Ni(OH)<sub>2</sub> nanosheets, 20 mM EDTA, and 2  $\mu$ M DNA.

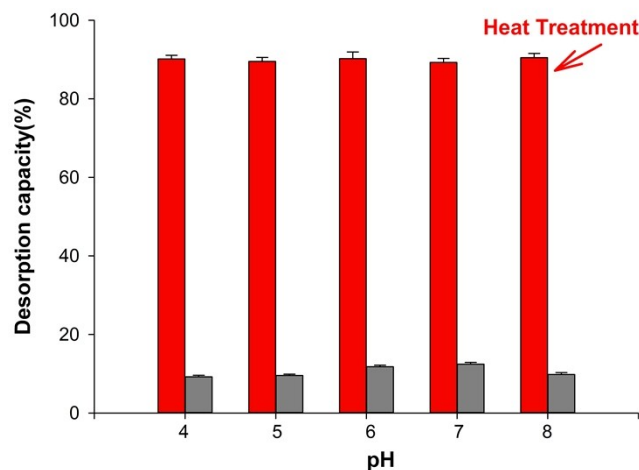

**Fig. S5** Effect of pH on the desorption efficiency of DNA on  $\beta$ -Ni(OH)<sub>2</sub> nanosheets. Each sample (25  $\mu$ L) contained a final buffer concentration of 25 mM, 100 mM KCl, 1 mM MgCl<sub>2</sub>, 0.96 mg/mL  $\beta$ -Ni(OH)<sub>2</sub> nanosheets, 20 mM EDTA, and 2  $\mu$ M DNA.

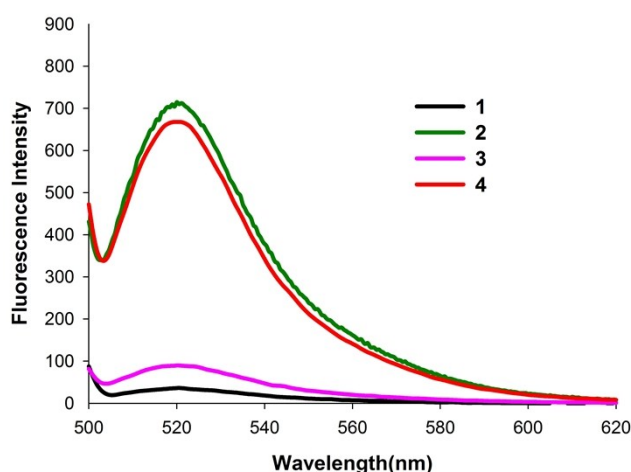

**Fig. S6** Fluorescence response of MB for different samples. MB was used as a signal probe to recognize DNA-141. The fluorescence signal is low when there is no DNA-141 in the sample 1. The fluorescence signal is dramatically increased as the addition of DNA-141 in the sample 2 (1200 nM, 20  $\mu$ L). We diluted sample 2 with buffer for 50-fold (sample 3: 24 nM, 20  $\mu$ L), and then added  $\beta$ -Ni(OH)<sub>2</sub> nanomaterial to adsorb and enrich DNA-141 (sample 3': 24 nM, 1000  $\mu$ L). After centrifugation and degradation, the adsorbed and enriched DNA-141 was desorbed and collected in sample 4 (20  $\mu$ L). The sample 4 was also analyzed by MB. The signal induced by sample 4 with desorbed DNA-141 was approach with the sample before diluted sample 2.

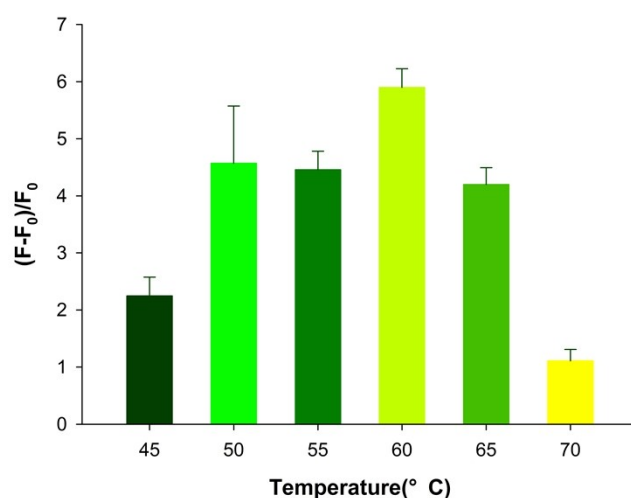

**Fig. S7** The performance of the assay was evaluated by the  $(F-F_0)/F_0$  at different temperatures, where  $F_0$  and  $F$  are the fluorescence signals in the absence and the presence of miRNA-141, respectively. The concentrations of 22-F, miRNA and  $\beta$ -Ni(OH)<sub>2</sub> nanosheets were 300 nM, 10 nM, 10 nM and 6  $\mu$ L (480  $\mu$ g/mL), respectively. Error bars are standard deviation of three repetitive experiments.

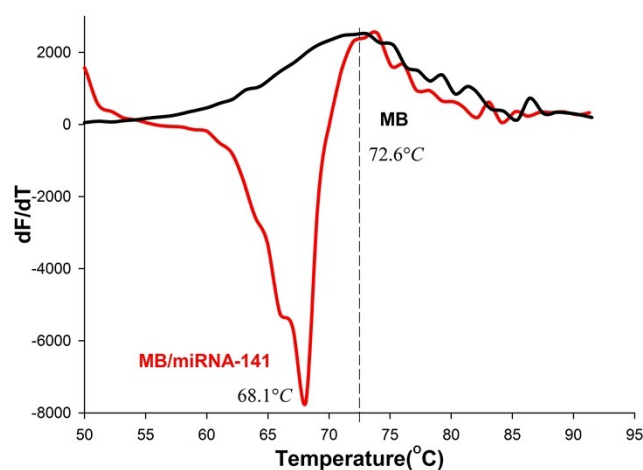

**Fig. S8** Melting curve of MB/miRNA-141 duplex. The  $T_m$  of MB/miRNA-141 is about 68 °C which is higher than the working temperature of DSN (60°C). The underlined sequence of MB(5'-FAM-CCTCCACCCATCTTTACCAGACAGTGTAGTGGAGG-BHQ1-3') is designed to recognize miRNA-141 and form MB/miRNA-141 duplex. The experiment was performed on a Mx 3005P real-time PCR equipment (Stratagene, USA).

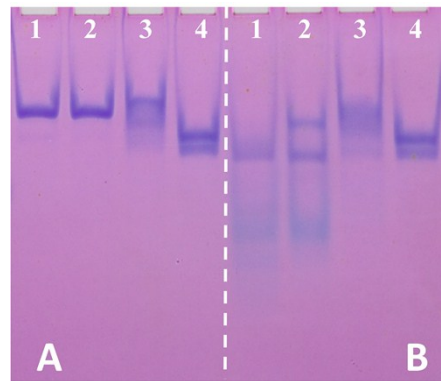

**Fig. S9** Non-denatured PAGE analysis of P-141 and miRNAs in the absence (**A**) and presence (**B**) of DSN. Lane 1: P-141+ miRNA-141; Lane 2: P-141+ SmiRNA-141; Lane 3: P-141+ miRNA-429; Lane 4: P-141+ miRNA-21. The concentrations of P-141, miRNA and DSN were 2000 nM, 2000 nM and 0.4 U, respectively.

**Table S2.** Average Ct values in qRT-PCR assay of miRNA-141<sup>a</sup>.

| Cell Sample | miRNA-141 | U6       | $\Delta Ct$ | $\Delta\Delta Ct$ | $2^{-(\Delta\Delta Ct)}$ |
|-------------|-----------|----------|-------------|-------------------|--------------------------|
| 22Rv1       | 18.41899  | 8.033598 | 10.3854     | 0                 | 1                        |
| 293T        | 26.92119  | 7.931848 | 18.98934    | 8.603945          | 0.00257                  |
| MDA-MB231   | 18.07741  | 8.019919 | 10.05749    | -0.32791          | 1.255191                 |
| HeLa        | 27.18598  | 7.833008 | 19.35297    | 8.967577          | 0.001998                 |

<sup>a</sup> Detection of miRNA-141 expression levels in total RNA isolated from four kinds of human cell lines using qRT-PCR method. For each sample, we added the same dosage of total RNAs. U6 was used as reference gene. The values of  $2^{-(\Delta\Delta Ct)}$  were relative with the expression levels. Relative expression levels were based on the expression ratio of miRNA-141 in target cell lines versus that in 22Rv1 cell lines. From the the values of  $2^{-(\Delta\Delta Ct)}$ , the expression level of miRNA-141 in 22Rv1 and MDA-MB231 cell line were estimated to be more than 400-fold of that in 293T and HeLa cell line, indicating the up-regulation of miRNA-141 in 22Rv1 and MDA-MB231 cell lines as compared with 293T and HeLa cell lines.
